# Supplementary material for: Oxidized Phospholipids Aggravate Hepatic Ischemia/Reperfusion Injury by Promoting Macrophage M1 Polarization via Regulating the Wnt/β-Catenin/Autophagy Axis
Source: Research Square preprint supplement (doi:10.21203/rs.3.rs-6604463/v1), 2025-05-19
Supplement: Supplementary file 1 [file 04248b07686bfa762173c05d.xlsx]

## Sheet: Sheet1
Gene	Forward primer	Reverse primer
IL1β	GAAATGCCACCTTTTGACAGTG	TGGATGCTCTCATCAGGACAG
TNFα	CAGGCGGTGCCTATGTCTC	CGATCACCCCGAAGTTCAGTAG
CXCL1	CTGGGATTCACCTCAAGAACATC	CAGGGTCAAGGCAAGCCTC
CXCL2	AAAGGCAAGGCTAACTGACCT	CTTTGGTTCTTCCGTTGAGG
CXCL5	AGCTGCGTTGCGTTTGTTTAC	TGGCGAACACTTGCAGATTAC
CD80	CCTCAAGTTTCCATGTCCAAGGC	GAGGAGAGTTGTAACGGCAAGG
NOS2	GTTCTCAGCCCAACAATACAAGA	GTGGACGGGTCGATGTCAC
CD86	GCCAGGTGTCATTTTCCTGACTA	GGCATTCAGTTCCAGGTCAGT
Actin	GGAGATTACTGCCCTGGCTCCTA	GACTCATCGTACTCCTGCTTGCTG
