# Supplementary material for: Oxidized Phospholipids Aggravate Hepatic Ischemia/Reperfusion Injury by Promoting Macrophage M1 Polarization via Regulating the Wnt/β-Catenin/Autophagy Axis
Source: Research Square preprint supplement (doi:10.21203/rs.3.rs-6604463/v1), 2025-05-19
Supplement: Supplementary file 2 [file 08d42e86cbb68037a201b1f2.xlsx]

## Sheet: Sheet1
Gene	Forward primer	Reverse primer
Dloop	AATCTACCATCCTCCGTGAAACC	TCAGTTTAGCTACCCCCAAGTTTAA
Tert	CTAGCT CATGTGTCAAGACCCTCTT	GCCAGCACGTTTCTCTCGTT
Non-numt	CTAGAAACCCCGAAACCAAA	CCAGCTATCACCAAGCTCGT
β2m	ATGGGAAGCCGAACATACTG	CAGTCTCAGTGGGGGTGAAT
ND2	GGCCATCGTACTCAACTATAA	GGTAATCAGAAGTGGAATGG
ND4	TACTAATAATCGCCCACGG	AATTCTCGTGTGTGGGAAGG
ND6	TGGTTGGTTGTCTTGGGTTGGCA	CCGCTACCCAATCCCTCCCT
cytB	GCAACCTTGACCCGATTCTTCGC	TGAACGATTGCTAGGGCCGCG
IL1β	GAAATGCCACCTTTTGACAGTG	TGGATGCTCTCATCAGGACAG
IL6	CTGCAAGAGACTTCCATCCAG	AGTGGTATAGACAGGTCTGTTGG
TNFα	CAGGCGGTGCCTATGTCTC	CGATCACCCCGAAGTTCAGTAG
MCP-1	GGCTGGAGAGCTACAAGAGG	TCTTGAGCTTGGTGACAAAAAC
CXCL1	CTGGGATTCACCTCAAGAACATC	CAGGGTCAAGGCAAGCCTC
CXCL2	AAAGGCAAGGCTAACTGACCT	CTTTGGTTCTTCCGTTGAGG
CXCL5	AGCTGCGTTGCGTTTGTTTAC	TGGCGAACACTTGCAGATTAC
CXCL15	TTTGTTTGGATCCTGATGCTC	CGGTGGAA0ATTCCTTTTGTT
CCL5	CCAGCAGTCGTCTTTGTCAC	CTCTGGGTTGGCACACACTT
CCL7	CCCTGGGAAGCTGTTATCTTCAA	CTCGACCCACTTCTGATGGG
NOS2	GTTCTCAGCCCAACAATACAAGA	GTGGACGGGTCGATGTCAC
CD86	GCCAGGTGTCATTTTCCTGACTA	GGCATTCAGTTCCAGGTCAGT
Actin	GGAGATTACTGCCCTGGCTCCTA	GACTCATCGTACTCCTGCTTGCTG

## Sheet: Sheet2
Antibodies	Source
Beta-catenin	Abcam,ab32572
LC3B	Abcam,ab192890
P62	Abcam,ab109012
Beclin1	Abcam,ab302669
Bcl2	Abcam,ab182858
Bax	Bioss,bsm-52316R
CD80	Abcam,ab315857
Beta-actin	AM1021B,abcepta
iNOS	CST,13120
